# Supplementary material
Source: publisher figshare collection journal article supplement (https://acs.figshare.com/ndownloader/files/6332496)
Supplement: Supplementary file 1 [file 6332496]

# Supporting Information

## Reductant-Free Synthesis of Silver

### Nanoparticles-Doped Cellulose Microgels for

### Catalyzing and Product Separation

Yangyang Han, Xiaodong Wu, Xinxing Zhang\*, Zehang Zhou, Canhui Lu\*

State Key Laboratory of Polymer Materials Engineering, Polymer Research Institute of Sichuan  
University, No. 24 South Section 1 of First Ring Road, Chengdu 610065, China

Total number of pages: 6 (S1-S6)

Total number of figures: 5 (Figure S1-Figure S5)

Total number of tables: 1 (Table S1)

---

*\*Corresponding author: Xinxing Zhang and Canhui Lu*  
***E-mail address: [xxzwwh@scu.edu.cn](mailto:xxzwwh@scu.edu.cn), [canhuilu@scu.edu.cn](mailto:canhuilu@scu.edu.cn)***  
*Tel: +86-28-85460607 Fax: +86-28-85402465*

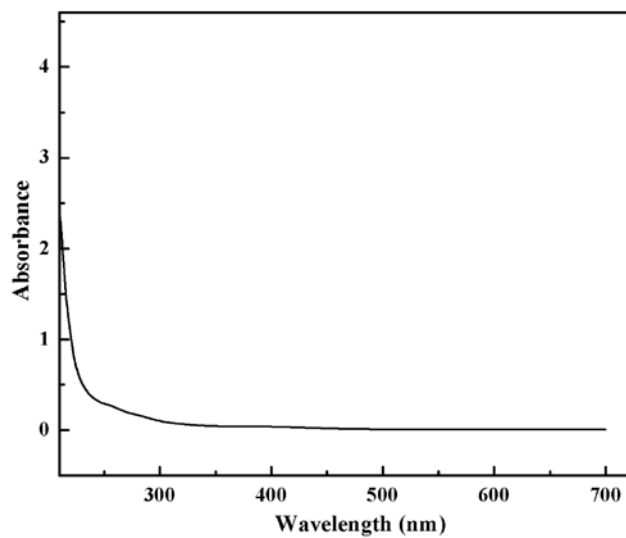

Figure S1. UV-vis spectrum of carboxymethylcellulose sodium.

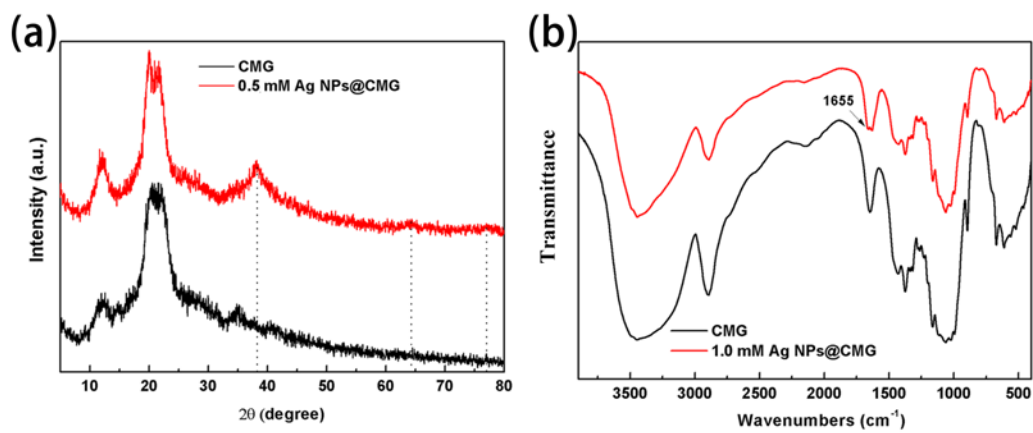

Figure S2. XRD patterns (a) and FTIR spectra (b) of CMG and Ag NPs@CMG nanohybrids.

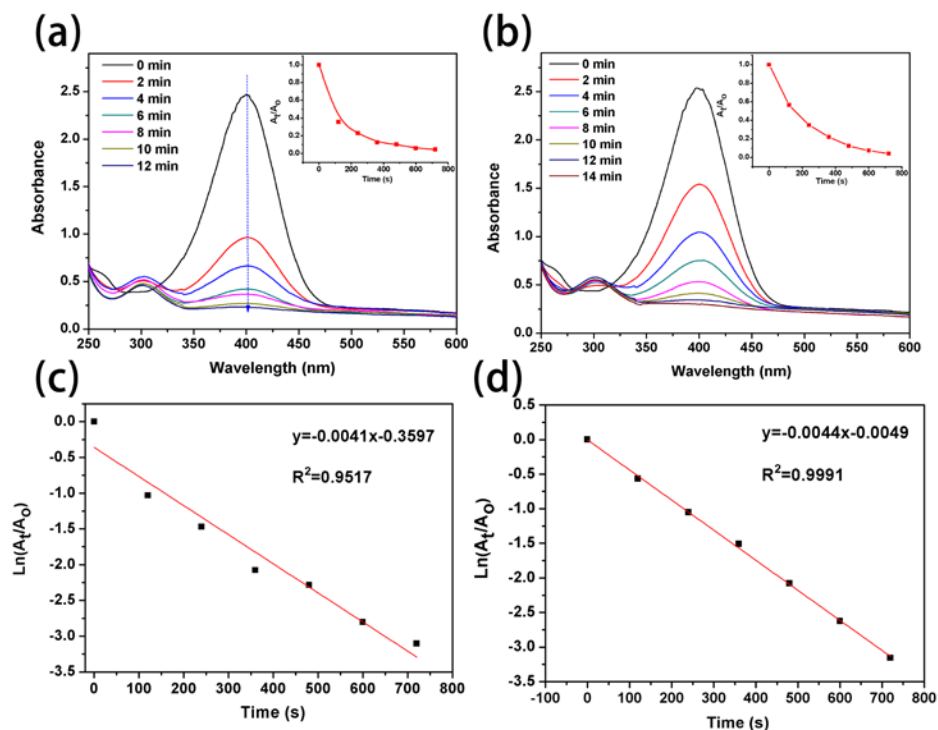

Figure S3. UV-visible spectra of the reduction of 4-NP catalyzed with 0.2 mM (a) and 1.0 mM (b) Ag NPs@CMG nanohybrids and plot of  $A_t/A_0$  against time (inset) respectively and plot of  $\ln(A_t/A_0)$  against time (0.2 mM, c; 1.0 mM, d ).

The catalytic activities of the 0.2 mM and 1.0 mM Ag NPs@CMG nanohybrids were evaluated and the process of the catalytic reactions was monitored by UV-vis spectroscopy. As depicted in Figure S3a-b, for 0.2 mM Ag NPs@CMG nanohybrids catalyzed reaction, the conversion reaches 95.6 % after 12 min and the conversion reaches 95.8 % after 12 min for 1.0 mM Ag NPs@CMG nanohybrids. Figure S3c-d show the plot of  $\ln(A_t/A_0)$  versus reaction time. A good linear correlation of  $\ln(A_t/A_0)$  versus time is obtained, which is consistent with the pseudo-first-order kinetics behavior. The pseudo-first-order rate constant  $k$  calculated from the slope is  $4.1 \times 10^{-3} \text{ s}^{-1}$  and  $4.4 \times 10^{-3} \text{ s}^{-1}$  for 0.2 mM and 1.0 mM Ag NPs@CMG nanohybrids respectively. These results indicate that the 0.2 mM and 1.0 mM Ag NPs@CMG nanohybrids also exhibit desirable catalytic activity.

Table S1. Comparison of various catalysts for reduction of 4-NP

| Samples                                | Temp.<br>(K) | Size of<br>metal<br>NP (nm) | NaBH <sub>4</sub> /4-NP/<br>metal<br>NP (Molar ratio) | K(10 <sup>-3</sup> s <sup>-1</sup> ) | TOF<br>(h <sup>-1</sup> ) | Reference |
|----------------------------------------|--------------|-----------------------------|-------------------------------------------------------|--------------------------------------|---------------------------|-----------|
| AgNPs/SiO <sub>2</sub> NWs             | 298          | 20±5                        | 1500/25/1                                             | 2.5                                  | 59.79                     | 1         |
| Au/PDDA/NCC                            | 298          | 2.95±0.06                   | 36585/37/1                                            | 5.1                                  | 212                       | 2         |
| Ag/Au/BNPs                             | 298          | 16±2                        | -                                                     | 5.1                                  | 38                        | 3         |
| Pd/Au/MCA                              | 298          | 3.5                         | 1760/20/1                                             | 4.7                                  | 142.5                     | 4         |
| Au/CNC                                 | 298          | 10-30                       | 9720/30/1                                             | 2.1                                  | 109                       | 5         |
| Ag/Fe <sub>3</sub> O <sub>4</sub> @NFC | 298          | 21.1                        | 4200/42/1                                             | 33                                   | 157.0                     | 6         |
| Ag NPs@CMG                             | 298          | 8                           | 14400/48/1                                            | 3.4                                  | 230.4                     | This work |

#### *Fabrication of Ag NPs@bulk gel*

At first, the cellulose bulk gel was prepared according to our previous work.<sup>7</sup> 100 g of aqueous solution with 7 wt% NaOH and 12 wt% urea was precooled to -12 °C. Then, 2 g (2 wt%) of cellulose was added immediately to the precooled solvent and stirred vigorously for 5 min at room temperature. After degasification, 20 g of the viscous cellulose solution was casted and coagulated in 5 wt% H<sub>2</sub>SO<sub>4</sub> and regenerated for 12 h at room temperature. The cellulose bulk gel was washed with running water and deionized water to remove all soluble substances. The same amount of AgNO<sub>3</sub> solution was added into the beaker with the bulk gel. The same concentration alkali with deionized water was added into the beaker. Subsequently, this system was stirred for 24 h at room temperature. The resultant Ag NPs@bulk gel was filtered and washed with deionized water to remove the residual chemical reagents.

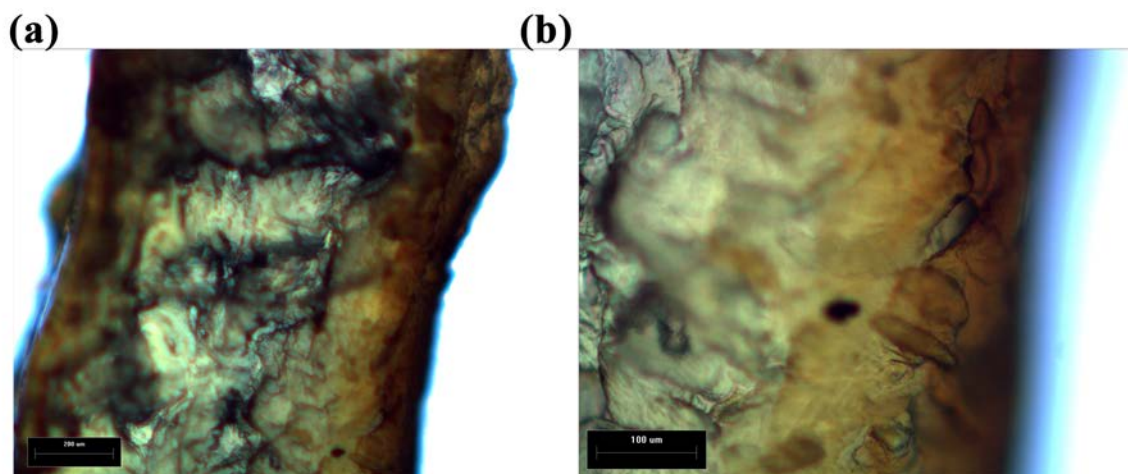

Figure S4. Optical microscope photographs of the section of Ag NPs@bulk gel at low (a, scale bar = 200 μm) and high (b, scale bar = 100 μm) magnifications.

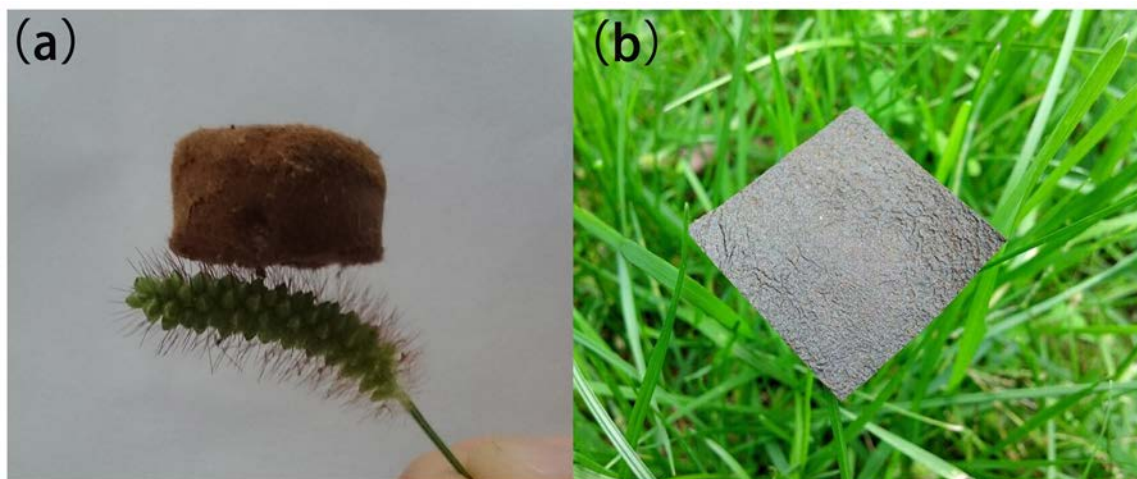

Figure S5. Digital photographs of Ag NPs@CMG aerogel (a) and film (b).

## References

1. Zhang, H.; Duan, T.; Zhu, W.; Yao, W. Natural chrysotile-based nanowires decorated with monodispersed Ag nanoparticles as a highly active and reusable hydrogenation catalyst. *J. Phys. Chem. C* **2015**, *119*, 21465-21472.
2. Lam, E.; Hrapovic, S.; Majid, E.; Chong, J. H.; Luong, J. H. T. Catalysis using gold nanoparticles decorated on nanocrystalline cellulose. *Nanoscale* **2012**, *4*, 997-1002.
3. Holden, M. S.; Nick, K. E.; Hall, M.; Milligan, J. R.; Chen, Q.; Perry, C. C. Synthesis and catalytic activity of pluronic stabilized silver-gold bimetallic nanoparticles. *RSC Adv.* **2014**, *4*, 52279-52288.
4. Jiang, F.; Li, R.; Cai, J.; Xu, W.; Cao, A.; Chen, D.; Zhang, X.; Wang, C.; Shu, C. Ultrasmall Pd/Au bimetallic nanocrystals embedded in hydrogen-bonded supramolecular structures: facile synthesis and catalytic activities in the reduction of 4-nitrophenol. *J. Mater. Chem. A* **2011**, *3*, 19433-19438.
5. Wu, X.; Lu, C.; Zhou, Z.; Yuan, G.; Xiong, R.; Zhang, X. Green synthesis and formation mechanism of cellulose nanocrystal-supported gold nanoparticles with enhanced catalytic performance. *Environ. Sci.: Nano* **2014**, *1*, 71-79.
6. Xiong, R.; Lu, C.; Wang, Y.; Zhou, Z.; Zhang, X. Nanofibrillated cellulose as the support and reductant for the facile synthesis of Fe<sub>3</sub>O<sub>4</sub>/Ag nanocomposites with catalytic and antibacterial activity. *J. Mater. Chem. A* **2013**, *1*, 14910-14918.
7. Han, Y.; Zhang, X.; Wu, X.; Lu, C. Flame retardant, heat insulating cellulose aerogels from waste cotton fabrics by in situ formation of magnesium hydroxide nanoparticles in cellulose gel nanostructures. *ACS Sustainable Chem. Eng.* **2015**, *3*, 1853-1859.
